# Supplementary material for: Machine-Learning Classifier for Patients with Major Depressive Disorder: Multifeature Approach Based on a High-Order Minimum Spanning Tree Functional Brain Network
Source: Comput Math Methods Med. 2017 Dec 14;2017:4820935. doi: 10.1155/2017/4820935 (PMC5745775; doi:10.1155/2017/4820935)
Supplement: Supplementary 10 — Supplemental Figure S2: Discrimination of different subgraphs. [file 4820935.f10.docx]

**Supplemental Figure S2. The discrimination of different subgraph**

**
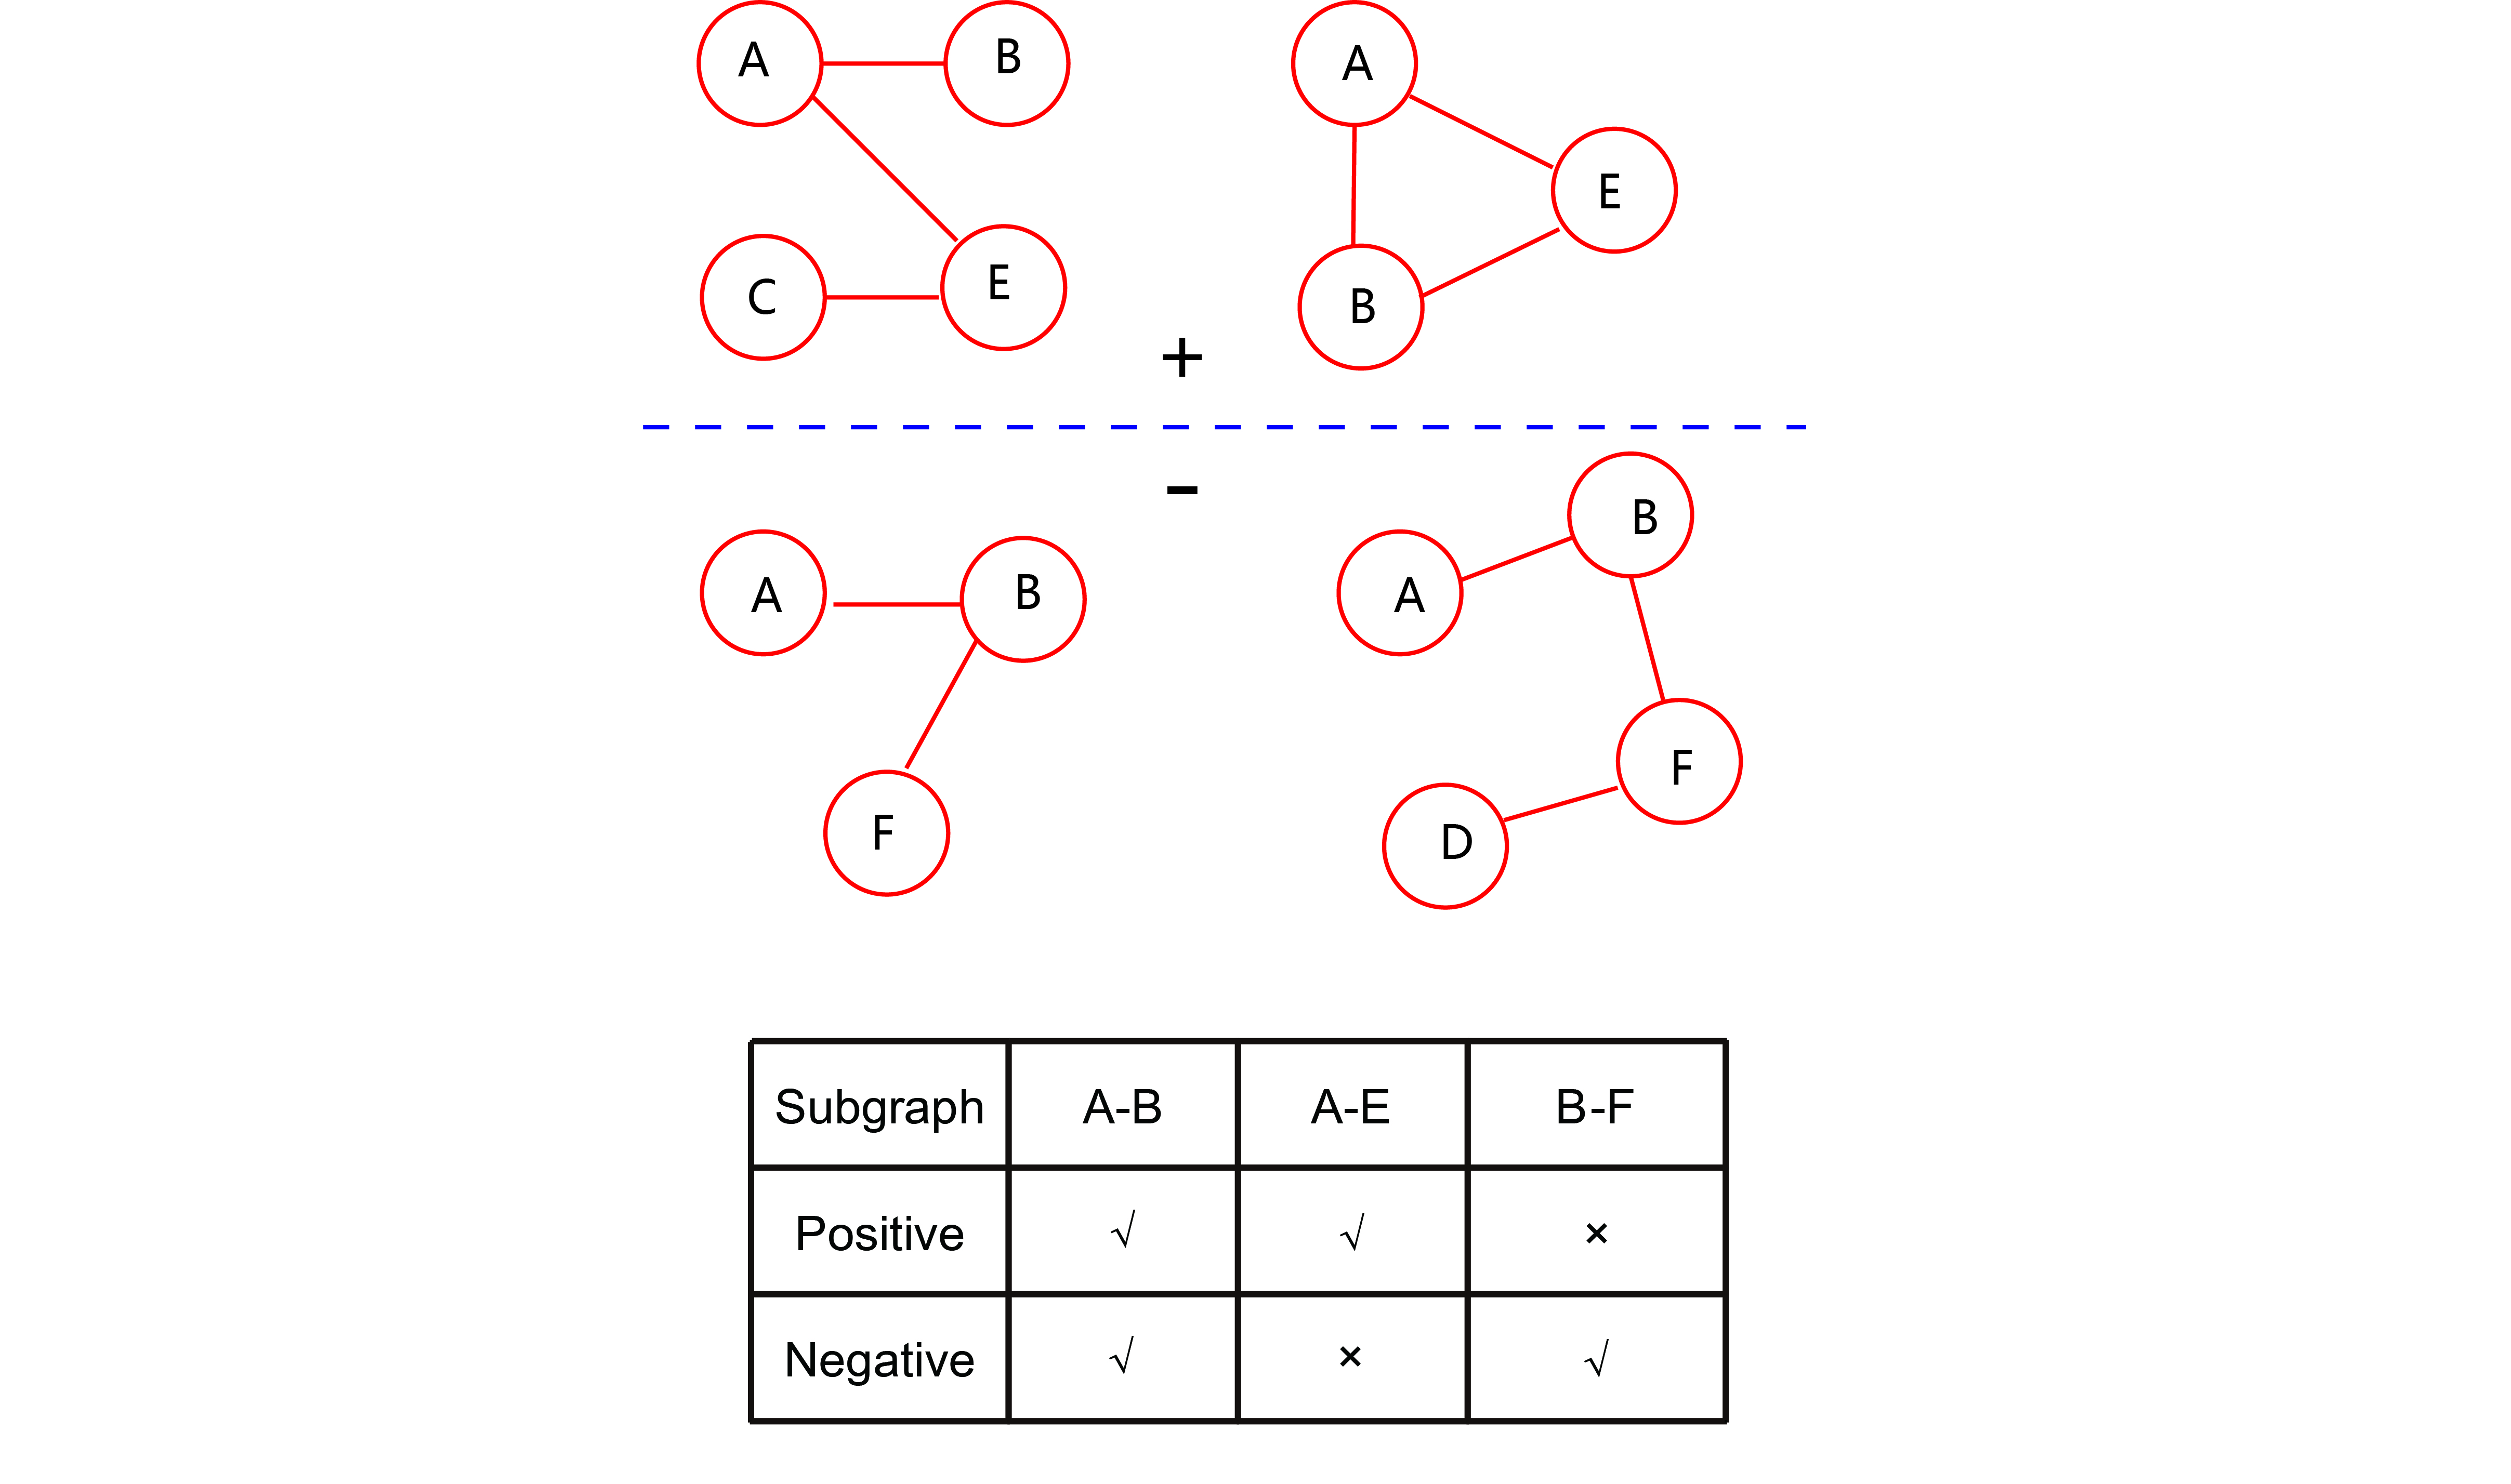
**

**Fig.2. illustrates the discrimination of different subgraph.** The both exists in the positive and negative samples, the exists only in the positive samples and the negative samples does not exist, and the only in the negative samples exists in a positive samples does not exist. Therefore, the subgraph feature and is more useful than and other subgraphs to positive or negative samples.
